# Supplementary material
Source: Springer Nature journal article supplement (https://www.springermedizin.de/resource/supplementary/12913_2011_2709_MOESM3_ESM.pdf/9531218)
Supplement: MOESM3 [file 9531218]

*Internal process:*

Acceptance of diagnosis  
Acknowledging the unchangeable  
Creating a feeling of balance  
Developing cognitive strategies  
Gaining or limiting medical information

Long-term condition

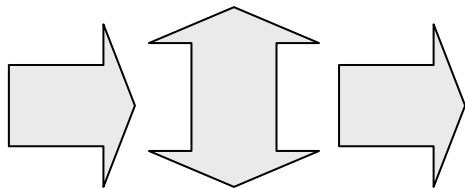

*Empowered patient:*

Identity  
Knowledge and understanding  
Personal control  
Decision making  
Enabling others

*External process:*

Relational support from significant others
